# Supplementary material
Source: MDPI journal article supplement (https://www.mdpi.com/2076-3417/8/12/2404)
Supplement: s1 [file s1]

**Figure 1.** Power management system circuit for multiple microbial fuel cells.

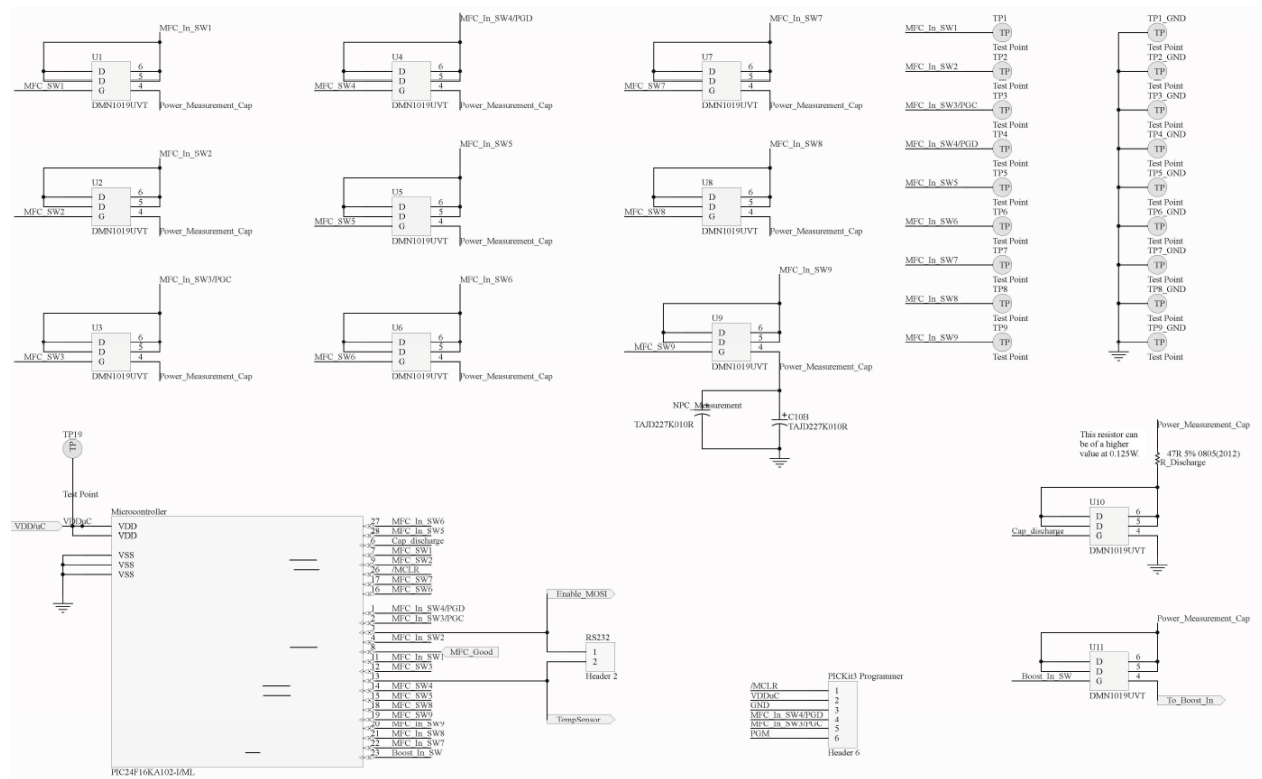

**Figure 2.** Microcontroller Microbial Fuel Cell (MFC) block schematic.

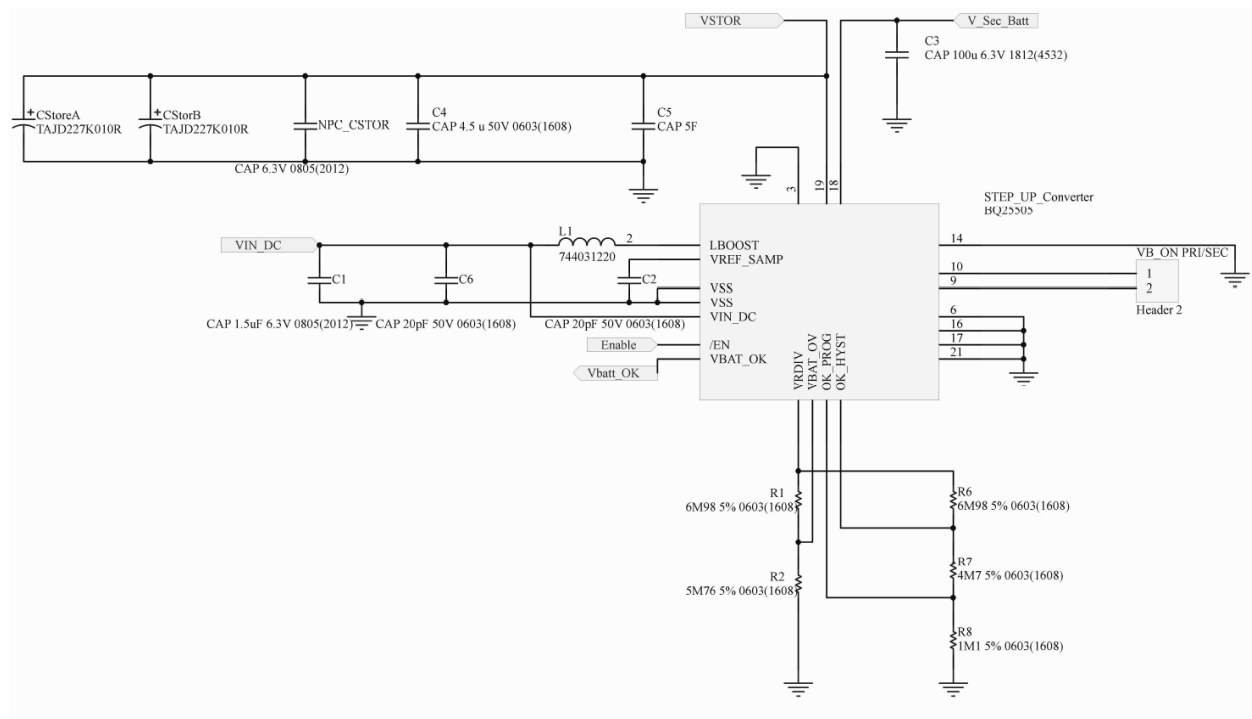

**Figure 3.** Step-Up Converter block schematic.
